# Supplementary material for: Wrist Movement Variability Assessment in Individuals with Parkinson’s Disease
Source: MDPI journal article supplement (doi:10.3390/healthcare10091656), 2022-08-30
Supplement: s1 [file s1]

**Table S1.** Variables that contribute the most to data variability description.

| Variable | Description                                                                                                                                                                      |
|----------|----------------------------------------------------------------------------------------------------------------------------------------------------------------------------------|
| T6F2S1   | root mean square of the capacitive signal during wrist extension in regular speed detected by sensor 1, on the radial-ulnar - y axis.                                            |
| T10F2S1  | root mean square of the capacitive signal during wrist extension in fast speed detected by sensor 1, on the radial-ulnar - y axis.                                               |
| T10F4S1  | mean of the absolute values of the first differences of normalized capacitive signal during wrist extension in fast speed on detected by sensor 1, on the radial-ulnar - y axis. |
| T6F3S1   | mean of the absolute values of the first differences of capacitive signal during wrist extension in regular speed on detected by sensor 1, on the radial-ulnar - y axis.         |
| T10F1S1  | mean absolute value of the capacitive signal during wrist extension in fast speed detected by sensor 1, on the radial-ulnar - y axis.                                            |
| T6F5S1   | mean of the absolute values of the second differences of capacitive signal during wrist extension in regular speed detected by sensor 1, on the radial-ulnar - y axis.           |
| T6F4S1   | mean of the absolute values of the first differences of normalized capacitive signal during wrist extension in regular speed detected by sensor 1, on the radial-ulnar - y axis. |
| T10F2S2  | root mean square of capacitive signal during wrist extension in fast speed detected by sensor 2, on the proximal-distal - z axis.                                                |
| T5F2S2   | root mean square of capacitive signal during wrist flexion in regular speed detected by sensor 2, on the proximal-distal - z axis.                                               |
| T9F2S2   | root mean square of capacitive signal during wrist flexion in fast speed detected by sensor 2, on the proximal-distal - z axis.                                                  |
| T6F2S2   | root mean square of capacitive signal during wrist extension in regular speed detected by sensor 2, on the proximal-distal - z axis.                                             |
| T6F1S2   | mean absolute value of the capacitive signal during wrist extension in regular speed detected by sensor 2, on the proximal-distal - z axis.                                      |
| T6F5S2   | mean of the absolute values of the second differences of capacitive signal during wrist extension in regular speed detected by sensor 2, on the proximal-distal - z axis.        |
| T6F3S2   | mean of the absolute values of the first differences of capacitive signal during wrist extension in regular speed detected by sensor 2, on the proximal-distal - z axis.         |
